# Supplementary material
Source: Springer Nature journal article supplement (https://www.springermedizin.de/resource/supplementary/12876_2008_356_MOESM6_ESM.pdf/9439234)

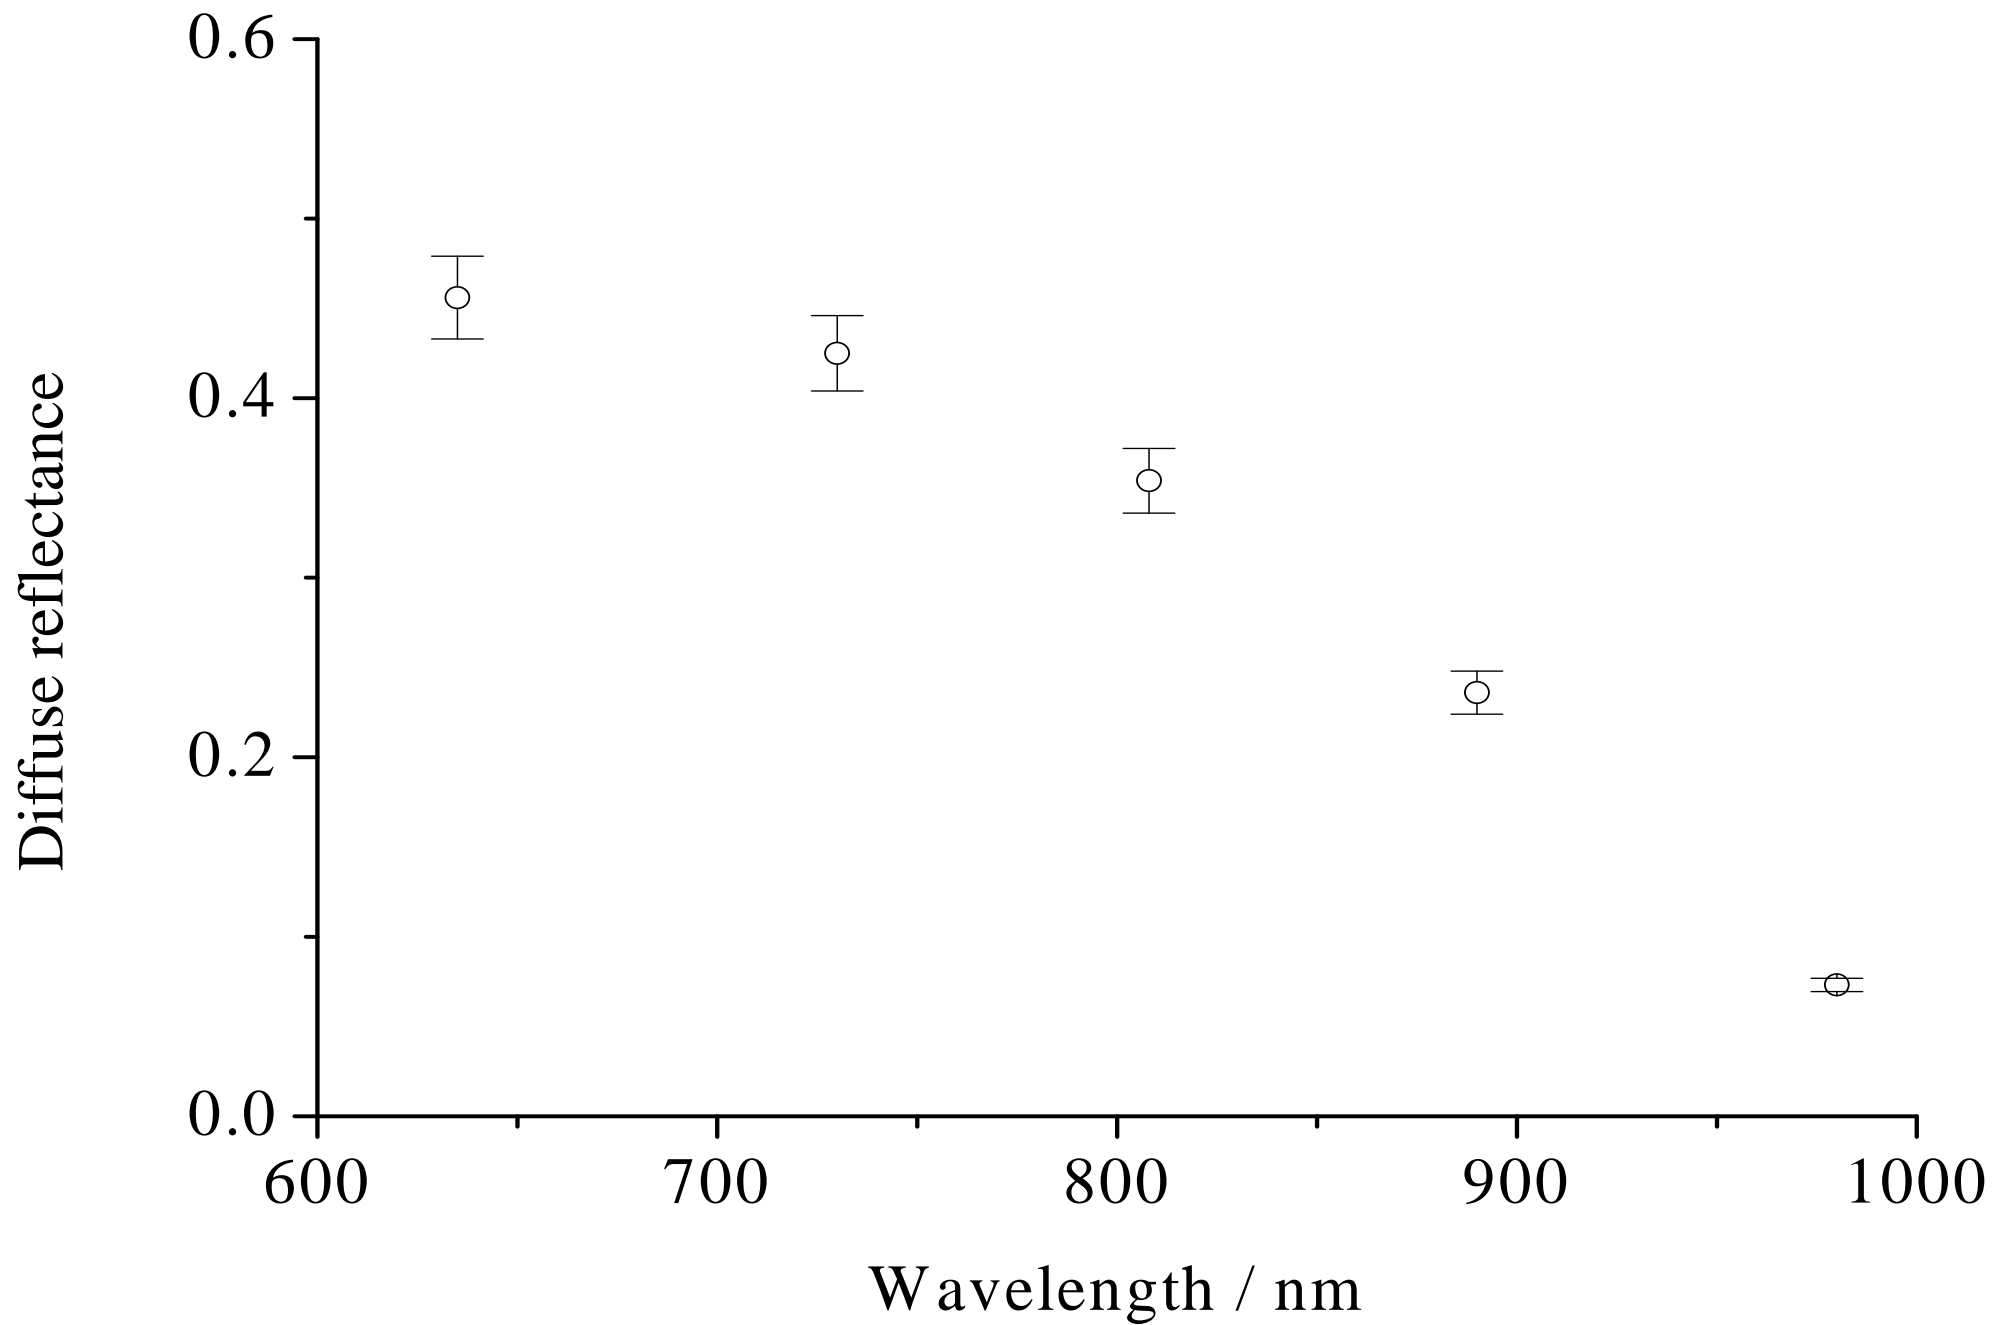

Supplement: MOESM6 [file 9439234]
